# Supplementary material for: Suicide along the Australian coast: Exploring the epidemiology and risk factors
Source: PLoS One. 2021 May 20;16(5):e0251938. doi: 10.1371/journal.pone.0251938 (PMC8136651; doi:10.1371/journal.pone.0251938)
Supplement: S3 Table — (XLSX) [file pone.0251938.s003.xlsx]

## Sheet: Supplementary Table 3.
Supplementary table 3. Broad summary of toxicological contributions (alcohol, drugs, combined alcohol and drugs) to coastal intentional fatalities
	Male (n)	Male concentration	Female (n)	Female concentration	Relative Risk			Permutational ANOVA (BAC)
		x̅ (n, SD)		x̅ (n, SD )	RR	RR 95% CI	RR p-value	df	Pseudo-F	p-value
Alcohol	60		14		1.73	1-3.01	0.054		NP
Drugs	62		27		0.93	0.61-1.41	0.7		NP
Alcohol and Drugs *	38		24		0.64	0.4-1.03	0.076		NP
Alcohol total	98		38		1.04	0.75-1.45	0.83		NP
Alcohol < 0.05	6		3		NP				NP
Alcohol > 0.05	92	0.18 (91, 0.133)	35	0.202 (35, 0.0977)	1.08	0.76-1.52	0.74	1, 124	1.245	0.32
Drugs total	100	9.59 (71, 26.3)	51	45.8 (45, 209)	0.79	0.6-1.06	0.119	1114	2.091	0.046
Other	4		0		NP
Unknown	58		28		NP
None	254		104		NP
Total (known) a	418		169
Grand Total b	476		197
a Also included in the count for alcohol total and drugs total
b does not include the sum of 'Alcohol Total' and 'Drug Total' which have already been counted
NP Not performed
